# Supplementary material for: Mitoxantrone-Loaded Nanoferritin Slows Tumor Growth and Improves the Overall Survival Rate in a Subcutaneous Pancreatic Cancer Mouse Model
Source: MDPI journal article supplement (doi:10.3390/biomedicines9111622), 2021-11-05
Supplement: s1 [file s1]

# Mitoxantrone-Loaded Nanoferritin Slows Tumor Growth and Improves the Overall Survival Rate in a Subcutaneous Pancreatic Cancer Mouse Model

Giamaica Conti <sup>1,†</sup>, Martina Pitea <sup>2,3,†</sup>, Riccardo Ossanna <sup>1</sup>, Roberta Opri <sup>4</sup>, Giada Tisci <sup>2</sup>, Elisabetta Falvo <sup>5</sup>, Giulio Innamorati <sup>6</sup>, Esther Ghanem <sup>7</sup>, Andrea Sbarbati <sup>1,†</sup>, Pierpaolo Ceci <sup>5,\*‡</sup> and Giulio Fracasso <sup>4,\*‡</sup>

<sup>1</sup> Department of Neurological and Movement Sciences, University of Verona, 37134 Verona, Italy; giamaica.conti@univr.it (G.C.); riccardo.ossanna@univr.it (R.O.); andrea.sbarbati@univr.it (A.S.)

<sup>2</sup> Department of Biochemical Sciences, University Sapienza, 00185 Rome, Italy; martina.pitea@uniroma1.it (M.P.); tisci.1887341@studenti.uniroma1.it (G.T.)

<sup>3</sup> Center for Life Nano Science@Sapienza Istituto Italiano di Tecnologia, 00161 Rome, Italy

<sup>4</sup> Department of Medicine, University of Verona, 37134 Verona, Italy; roberta.opri@gmail.com

<sup>5</sup> Institute of Molecular Biology and Pathology, CNR—National Research Council of Italy, 00185 Rome, Italy; elisabetta.falvo@cnr.it

<sup>6</sup> Department of Surgical Sciences, Dentistry, Gynecology and Pediatrics, Section of Surgery, University of Verona, 37134 Verona, Italy; giulio.innamorati@univr.it

<sup>7</sup> Department of Sciences, Notre Dame University-Louaize, XJ28+73C Zouk Mosbeh, Lebanon; eghanem@ndu.edu.lb

\* Correspondence: pierpaolo.ceci@cnr.it (P.C.); giulio.fracasso@univr.it (G.F.); Tel.: +39-06-4991-0761 (P.C.); +39-04-5812-6449 (G.F.)

† These authors contributed equally to this work.

‡ These authors share senior authorship.

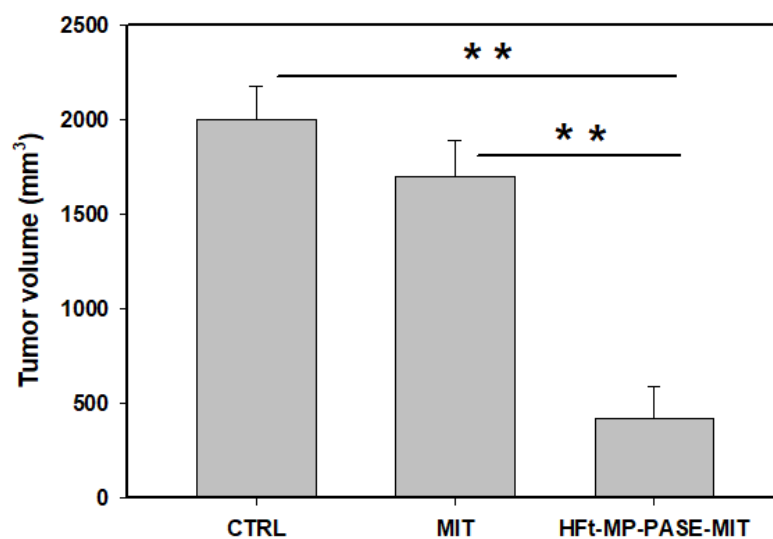

**Figure S1.** Tumor volume of the three group of treated mice (HFt-MP-PASE-MIT, MIT or saline) at day 48 after tumor cell injection. (n=4) \*p<0.05, \*\*p<0.01

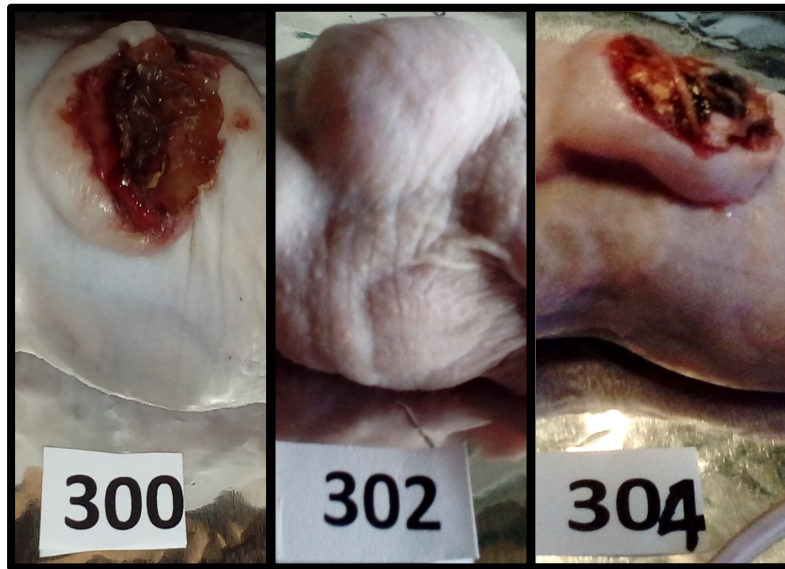

**Figure S2.** Pictures of the tumors of HFt-MP-PASE-MIT<sup>+</sup> treated mice at sacrifice. Mice 300 and 304 were sacrificed before they gain a tumor volume  $\geq 1,500 \text{ mm}^3$  due the high eschars formed for necrosis of tumor cells. Mouse 302, included in the same treatment group, did not developed eschars.

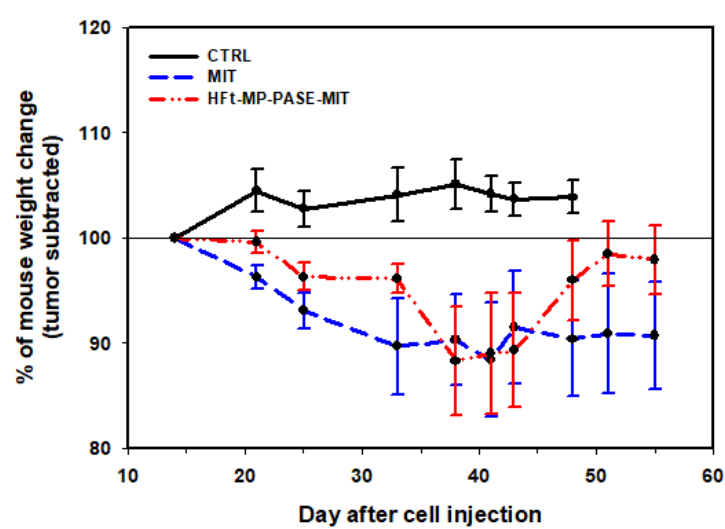

**Figure S3.** Percentage of mouse weight change during the treatment with HfT-MP-PASE-MIT, MIT or saline. (n=4)
